# Supplementary material for: NO 3 reactivity during a summer period in a temperate forest below and above the canopy
Source: Copernicus journal article supplement (doi:10.5194/egusphere-2024-1223), 2024-04-30
Supplement: Supplementary file [file egusphere-2024-1223-AC2-supplement.pdf]

## Reply to RC1

*In the following, the referee's comments are reproduced (black) along with our replies (blue) and changes made to the text (red) in the revised manuscript. Line numbers refer to those in the initial submission.*

### General Comments:

The work by Patrick Dewald et al. is relevant to the atmospheric science community, well organized and well written. The quantitative details regarding NO<sub>3</sub> reactivity and fractional contribution to biogenic volatile organic compound (BVOC) oxidation appear robustly determined, clear and generally consistent with literature. Their results suggest an important conclusion that NO<sub>3</sub> can play a significant role during daytime oxidation which is counter to textbook atmospheric chemistry but not necessarily unheard of. However, there are a couple of points of concern.

We thank the reviewer for the positive assessment of our manuscript and for the provision of helpful comments.

First, the authors are reserving a more in-depth analysis of NO<sub>3</sub> oxidation from the same measurements and campaign for a future publication. These details seem highly relevant to information presented here and I question why they are better suited for an independent publication. Doing so removes context which would define the significance of the results.

The main objectives of this work are to identify factors that control the temporal and vertical variability in  $k^{\text{VOC}}$  and to assign the contribution of VOCs, NO and photolysis to NO<sub>3</sub> removal. We refrain from including explicit analysis of VOC and NO<sub>3</sub> measurements for the following reasons:

- 1) The scope of this paper is already well-defined and extensive. We believe that inclusion of the analysis of NO<sub>3</sub> and VOC measurements not only conceals the key message but also reduces the readability of the resulting (longer) paper.
- 2) A rigorous assignment of  $k^{\text{VOC}}$  to specific compounds is not (yet) possible due to lack of speciated monoterpene measurements at ground level.
- 3) Ideally, all directly related information from the campaign would be incorporated in one paper. However, as the reviewer will be aware, students, post-docs etc. need first author publications. Expanding this manuscript to cover detailed aspects of NO<sub>3</sub>-reactivity as related to VOCs would not only make it unreadable but would also preclude first-author papers for the owners (French groups) of the VOC-data and the NO<sub>3</sub>-measurements. As we already note in the paper, a comparison between calculated (steady-state) and measured NO<sub>3</sub> (or N<sub>2</sub>O<sub>5</sub>) mixing ratios above and below canopy level are going to be presented in the future publication along with an assignment of  $k^{\text{VOC}}$  to measured VOCs.

4) The concerns raised by the reviewer can be addressed with the data provided in the manuscript. We extend the discussion as detailed in the answers below.

Second, it is unclear if the cause for significant daytime oxidative contribution from  $\text{NO}_3$  is due to reduced photolysis or increased VOC concentration. The answer to this point may be answered in the author's future publication but, again, it appears highly relevant here.

We agree that this point is highly relevant. In order to assess the impact of actinic flux reduction below the canopy,  $F^{\text{VOC}}(5.5 \text{ m})$  was calculated using above-canopy values of  $J_{\text{NO}_3}$  and NO. This would result in an average daytime value for  $F^{\text{VOC}}$  of 33 %. This value is lower than the actual value of ca. 50 % and the reduction by a factor of 0.66 can be assigned to the attenuation of sunlight by trees and by the tower. However, even 33 % would be significantly higher than 20 % observed in a boreal forest in Hyytiälä, (Liebmann et al., 2018). This difference can be reconciled with higher daytime values  $k^{\text{VOC}}$  measured in Rambouillet. The increased daytime average of  $F^{\text{VOC}}$  thus stems from both reduced photolysis below the canopy and presumably from the higher abundance of highly reactive BVOCs. We accordingly extend the discussion in our manuscript in L264:

In order to assess the impact of this effect, we calculated  $F^{\text{VOC}}$  with above-canopy values of  $J_{\text{NO}_3}$  and NO. In this scenario, daytime  $F^{\text{VOC}}$  increases to 33 %, i.e. the reduction of photolysis frequencies increases  $F^{\text{VOC}}$  by a factor of 1.5. Liebmann et al. (2018) reported a daytime average for  $F^{\text{VOC}}$  of only 20 % in a boreal forest. Despite the fact that both sites are similarly affected by low NO and high monoterpene levels, this value is still significantly lower than 33 %, which can be reconciled with lower daytime values of  $k^{\text{VOC}}$  in the boreal forest. The comparatively high daytime contribution of VOCs to  $\text{NO}_3$  consumption below the canopy thus stems from both reduction in  $J_{\text{NO}_3}$  and higher values of  $k^{\text{VOC}}$ , latter most likely due to higher concentrations of monoterpenes than in the boreal forest.

#### **Specific Comments in order of line number:**

1) Lines 100–108: Here, the authors describe the inlets however I did not see any discussion of inlet loss rates or the potential effects on reactivity measurements. I am concerned that the 40 m tall measurements (with a 20 m length and  $\sim 5$  s residence time) may have wall loss of VOCs. Such an effect would result in reduced  $\text{NO}_3$  reactivity as seen in Figure 1. Some mention of this point would strengthen the validity of these measurements.

During the week when switching between tower and ground measurement, the instrument not only sampled through the tubing (ca. 5 s residence time) but also through the glass flask (ca. 40 s residence time) throughout the diel cycle. The residence time in the PFA tubing is thus only of minor importance compared to the time spent in the flask. From the time before 18 July, no change in  $k^{\text{VOC}}$  levels was observed when switching between flask and bypass at 03:30 and 19:30 UTC, suggesting that no compounds significantly contributing to  $k^{\text{VOC}}$  are lost in the glass flask. Given the higher reactivity of uncoated borosilicate glass surfaces compared to PFA and the shorter residence time in the tubing, a significant transmission loss in the latter

appears unlikely. We now clarify this in the manuscript by adding in L118-120:

As the presence of  $\text{NO}_3$  and  $\text{N}_2\text{O}_5$  in ambient air would bias the measurement, **at nighttime** the air was sampled through a 2 L glass flask (**heated to 35°C**, ~ 40 s residence time) to ensure that ambient  $\text{N}_2\text{O}_5$  is converted to  $\text{NO}_3$ . All radicals including  $\text{NO}_3$ , OH,  $\text{RO}_2$  and  $\text{HO}_2$  are lost on the glass walls and thus prevented from reaching the flowtube. **From July 18, air was sampled through the glass flask throughout the diel cycle. Note however that no difference in  $k^{\text{VOC}}$  levels was observed directly after switching between “daytime mode” (no flask) and “nighttime mode” (sampling through flask) during the period before. This implies that no compounds significantly contributing to  $k^{\text{VOC}}$  are lost in the glass flask.**

2) Section 3.1: the overall discussion here is clear, but I am left with a question of how the temperature inversion effects the production of  $\text{NO}_3$ , which will contextualize the importance of the resulting  $k^{\text{VOC}}$ . As stated by the authors, the temperature inversions are associated with decreased  $\text{O}_3$  (and presumed decrease in  $\text{NO}_3$  production) but increased  $k^{\text{VOC}}$ . The effect of these two counteracting variables is absent from the discussion. I believe such a discussion is needed.

Such a discussion is misplaced in section 3.1 since the variability in  $k^{\text{VOC}}$  (main point of this section) is independent of the  $\text{NO}_3$  production rate. The interplay only becomes relevant in the discussion of  $\text{NO}_3$  mixing ratios. Note that “these counteracting variables” both lead to a reduction in  $\text{NO}_3$ . As indicated in the answer to the general comments, an in-depth analysis of  $\text{NO}_3$  production rates and mixing ratio will be addressed in a future publication. Instead, we emphasize this point even more than before in L330:

**This is not only related to the reduced availability of  $\text{O}_3$  but also to the increase in  $k^{\text{VOC}}$ , both of which were usually accompanied by temperature inversions.**

3) Lines 220–222: The authors state that their analysis (Figure 3) suggests temperature is an important factor that influences  $\text{NO}_3$  reactivity by BVOC emission. However, I do not find the same conclusion because such a relationship is not apparent in Figure 3. It is clear that the BVOC emission is dependent on temperature (by design) but, as the authors state in the discussion, the relationship between emission and  $\text{NO}_3$  reactivity is clouded by competing oxidants during the daytime. The conclusion from this discussion appears to be simply that inversion has a strong effect (Figure 3b). I suggest the authors offer a better justification for their conclusion, remove this point, or provide additional VOC data to elaborate.

As already indicated in the manuscript, daytime chemistry affects VOC concentrations. Nevertheless, measured BVOC mixing ratios can clearly correlate with air temperature as shown for example with isoprene in Kalogridis et al. (2014). In spite of the reduced chemical selectiveness of OH compared to  $\text{NO}_3$ , this is even reflected in temperature-correlated OH reactivities in environments dominated by BVOC emissions (Pfannerstill et al., 2021). Consequently, a correlation between air temperature and  $\text{NO}_3$  reactivity appears plausible. We admit that the daytime correlation between  $T(5\text{ m})$  and  $k^{\text{VOC}}$  is hard to see in Figure 3a, which

is why we now added an inset plotting daytime  $k^{\text{VOC}}$  (10:00 to 14:00 UTC) against air temperature along with a linear regression. The daytime values of  $k^{\text{VOC}}$  (black points due to a new color map, see below) are clearly correlated with air temperature (Pearson correlation coefficient  $r = 0.66$ ). We modified the figure and caption and the text in L220-224 accordingly:

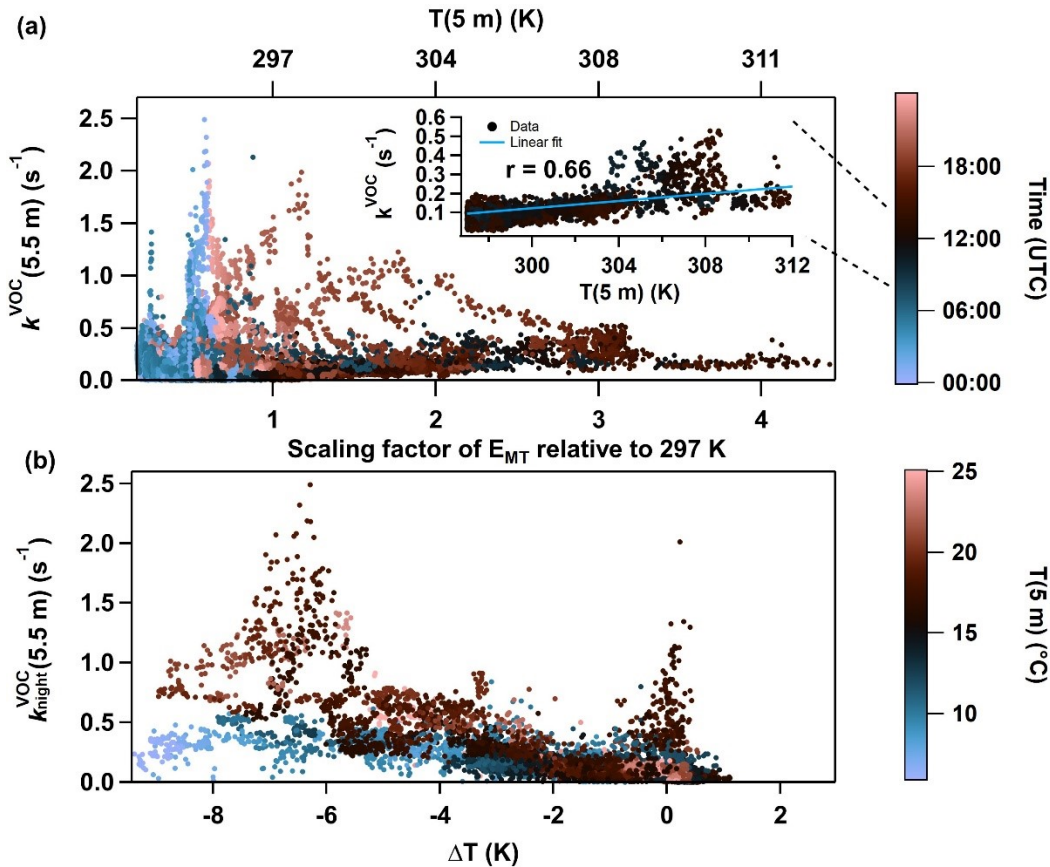

L220: Relative monoterpene emission factors are temperature-dependent and described by  $\exp(\beta(T-297 \text{ K}))$  with  $\beta = 0.1 \text{ K}^{-1}$  in forested environments (Guenther et al., 1993), resulting in a strong seasonal variation (Hakola et al., 2006; Vermeuel et al., 2023). As a consequence, correlations between air temperature and VOC mixing ratios and OH reactivity have been reported (Kalogridis et al., 2014; Pfannerstill et al., 2021). Figure 3a shows that, during the day (black data points), with temperatures varying from 297 to 311 K, an increase in  $k^{\text{VOC}}(5.5 \text{ m})$  is observed. The inset contains daytime values measured between 10:00 and 14:00 UTC against air temperature and a linear regression suggests a fair correlation between the two (Pearson correlation coefficient  $r = 0.66$ ). The expected factor of 4 increase in the emission rate over this range as reported in Guenther et al. (1993) is much larger than the observed change in  $k^{\text{VOC}}(5.5 \text{ m})$ .

4) Lines 264–265: The point by the authors that Decker et al. (I am the first author of this cited paper) find  $\text{NO}_3$  is a major oxidant during daytime for wildfire plumes due to their reduced photolysis rates is incorrect. Instead, the cited work concludes that  $\text{NO}_3$  is a major daytime oxidant in wildfire plumes because smoke plumes are a huge source of reactive VOCs which

outcompetes photolysis. This point is (admittedly hard to find) most clearly argued for a smoke plume (Castle) with a  $j\text{NO}_3$  of  $0.14 \text{ s}^{-1}$  sampled mid-day which is comparable to mid-day photolysis rates presented here (Figure 1). In that cited case, photolysis accounted for  $\sim 0.6 \%$  of  $\text{NO}_3$  loss but the large source of VOCs accounts for the remainder of  $\text{NO}_3$  loss. The overall conclusion of the cited work is also that  $\text{NO}_3$  oxidation can be significant during daytime (in the case of biomass burning plumes).

Thank you very much for clarifying this, we have corrected this point in L264/265:

This observation is consistent with even higher daytime VOC contributions to  $\text{NO}_3$  loss of  $>97 \%$  reported for sunlit wildfire plumes by Decker et al. (2021) who reconciled their result with VOC mixing ratios that were sufficiently high to outcompete photolysis and  $\text{NO}$ .

This brings up the question of whether the large daytime  $F^{\text{VOC}}$  here is the result of reduced photolysis or large BVOC concentrations (or both). As written, the authors appear to suggest that large daytime  $F^{\text{VOC}}$  is due to reduced sunlight although a definitive conclusion is not clear. The authors acknowledge that  $\text{NO}_3$  production will also be affected by reduced sunlight, but the effect is not discussed.

A major conclusion of this work is that  $\text{NO}_3$  is a significant daytime oxidant in this sub-urban forest yet a reason is not clear. Such a conclusion is counter-intuitive based on textbook atmospheric chemistry (as mentioned by the authors). As such, understanding the conditions that cause such a result is highly relevant and important to the atmospheric community. I feel strongly that an interpretation of the cause of a large daytime  $F^{\text{VOC}}$  would provide highly important context for the author's conclusion that  $\text{NO}_3$  reactivity is significant during the daytime. I strongly suggest the authors provide further analysis (e.g.  $\text{NO}_3$  production, information on BVOCs and concentrations) so that the importance of this result is better realized.

We have already addressed these points in the answer to the general comments above.

5) Section 3.6: I have a minor point that (to my understanding) equation 4 is a reactivity, not an oxidation rate, because it is first order and does not include the VOC concentration. Perhaps it could also be called the total loss rate as was done for  $\text{NO}_3$ .

We agree and now call it, in analogy to  $\text{NO}_3$ , loss rate coefficient throughout the whole manuscript.

## Technical Details:

Line 283: “Recall however, that due its poor” typo here.

Correction made to “due to”.

Line 296: “Figure 2 (period p)” seems wrong.

Correction made to “Fig. 7”.

Figure 3(a): I suggest to change to x-axis label to something more interpretable by the reader such as “Calculated BVOC emission (unitless?)”.

Adjustment made, we changed the x-axis label to “ $E_{MT}(T) / E_{MT}(297\text{ K})$ ”.

Figure color scales: I encourage the authors to use color scales that are readable in grey-scale. This improves accessibility to color blind readers. For example, see Crameri et al. 2020 (<https://doi.org/10.1038/s41467-020-19160-7>).

Adjustment made, Fig. 2, 3 and S1 have been modified accordingly. We further note in the Acknowledgements:

The Scientific colour map “Berlin” (Crameri, 2023) is used in this study to prevent visual distortion of the data and exclusion of readers with colour-vision deficiencies (Crameri et al., 2020).

Figure markers: to the above point I encourage the authors to use opposing marker styles (such as filled and empty circles) so that the reader does not rely on color to differentiate these markers.

All figures have been modified accordingly.

## References

Crameri, F., Shephard, G. E., and Heron, P. J.: The misuse of colour in science communication, *Nat. Commun.*, 11, 5444, doi:10.1038/s41467-020-19160-7, 2020.

Crameri, F.: Scientific colour maps (8.0.1), Zenodo, doi:10.5281/zenodo.8409685, 2023.

Decker, Z. C. J., Robinson, M. A., Barsanti, K. C., Bourgeois, I., Coggon, M. M., DiGangi, J. P., Diskin, G. S., Flocke, F. M., Franchin, A., Fredrickson, C. D., Gkatzelis, G. I., Hall, S. R., Halliday, H., Holmes, C. D., Huey, L. G., Lee, Y. R., Lindaas, J., Middlebrook, A. M., Montzka, D. D., Moore, R., Neuman, J. A., Nowak, J. B., Palm, B. B., Peischl, J., Piel, F., Rickly, P. S., Rollins, A. W., Ryerson, T. B., Schwantes, R. H., Sekimoto, K., Thornhill, L., Thornton, J. A., Tyndall, G. S., Ullmann, K., Van Rooy, P., Veres, P. R., Warneke, C., Washenfelder, R. A., Weinheimer, A. J., Wiggins, E., Winstead, E., Wisthaler, A., Womack, C., and Brown, S. S.: Nighttime and daytime dark oxidation chemistry in wildfire plumes: an observation and model analysis of FIREX-AQ aircraft data, *Atmos. Chem. Phys.*, 21, 16293-16317, doi:10.5194/acp-21-16293-2021, 2021.

Guenther, A. B., Zimmerman, P. R., Harley, P. C., Monson, R. K., and Fall, R.: Isoprene and Monoterpene Emission Rate Variability - Model Evaluations and Sensitivity Analyses, *J. Geophys. Res.-Atmos.*, 98, 12609-12617, doi:10.1029/93jd00527, 1993.

Hakola, H., Tarvainen, V., Back, J., Ranta, H., Bonn, B., Rinne, J., and Kulmala, M.: Seasonal variation of mono- and sesquiterpene emission rates of Scots pine, *Biogeosciences*, 3, 93-101, doi:10.5194/bg-3-93-2006, 2006.

Kalogridis, C., Gros, V., Sarda-Esteve, R., Langford, B., Loubet, B., Bonsang, B., Bonnaire, N., Nemitz, E., Genard, A. C., Boissard, C., Fernandez, C., Ormeño, E., Baisnée, D., Reiter, I., and Lathièrè, J.: Concentrations and fluxes of isoprene and oxygenated VOCs at a French Mediterranean oak forest, *Atmos. Chem. Phys.*, 14, 10085-10102, doi:10.5194/acp-14-10085-2014, 2014.

Liebmann, J., Karu, E., Sobanski, N., Schuladen, J., Ehn, M., Schallhart, S., Quéléver, L., Hellen, H., Hakola, H., Hoffmann, T., Williams, J., Fischer, H., Lelieveld, J., and Crowley, J. N.: Direct measurement of NO<sub>3</sub> radical reactivity in a boreal forest, *Atmos. Chem. Phys.*, 18, 3799-3815, doi:10.5194/acp-18-3799-2018, 2018.

Pfannerstill, E. Y., Reijrink, N. G., Edtbauer, A., Ringsdorf, A., Zannoni, N., Araújo, A., Ditas, F., Holanda, B. A., Sá, M. O., Tsokankunku, A., Walter, D., Wolff, S., Lavrič, J. V., Pöhlker, C., Sörgel, M., and Williams, J.: Total OH reactivity over the Amazon rainforest: variability with temperature, wind, rain, altitude, time of day, season, and an overall budget closure, *Atmos. Chem. Phys.*, 21, 6231-6256, doi:10.5194/acp-21-6231-2021, 2021.

Vermeuel, M. P., Novak, G. A., Kilgour, D. B., Claflin, M. S., Lerner, B. M., Trowbridge, A. M., Thom, J., Cleary, P. A., Desai, A. R., and Bertram, T. H.: Observations of biogenic volatile organic compounds over a mixed temperate forest during the summer to autumn transition, *Atmos. Chem. Phys.*, 23, 4123-4148, doi:10.5194/acp-23-4123-2023, 2023.
